# Supplementary material
Source: PubMed Central journal article supplement (PMC4255398)
Supplement: CJN.02260314_CJN02260314SupplementaryData.pdf [file CJN.02260314_CJN02260314SupplementaryData.pdf]

**ONLINE SUPPLEMENTAL MATERIAL**

**Supplemental Table 1** Association of fiber intake with estimated glomerular filtration rate using the CKD-EPI equation (mL/min/1.73m<sup>2</sup>).

| Linear regression models      | Cut point          | Unadjusted             |          | Model 1                |          | Model 2                |          |
|-------------------------------|--------------------|------------------------|----------|------------------------|----------|------------------------|----------|
|                               |                    | Difference<br>(95% CI) | <i>P</i> | Difference<br>(95% CI) | <i>P</i> | Difference<br>(95% CI) | <i>P</i> |
| <b>Entire cohort (n=1110)</b> |                    |                        |          |                        |          |                        |          |
| Dietary fiber                 | Per 10g/day higher | 3.68 (1.53, 5.82)      | 0.001    | 3.06 (0.81, 5.30)      | 0.01     | 2.58 (0.30, 4.87)      | 0.03     |

Covariates in model 1 include protein intake (energy adjusted), age, BMI, smoking, physical activity, and education.

Covariates in model 2 include protein intake (energy adjusted), age, BMI, smoking, physical activity, education, cardiovascular disease, diabetes, hyperlipidemia, hypertension, and urinary albumin excretion rate.

Abbreviations: CI, confidence interval.

**Supplemental Table 2** Associations of dietary fiber with serum IL-6 (per Log<sub>2</sub> increase, ng/L) (n=1110).

| Linear regression models                | Cut point/limits  | Unadjusted           |          | Model 1              |          | Model 2              |          |
|-----------------------------------------|-------------------|----------------------|----------|----------------------|----------|----------------------|----------|
|                                         |                   | Difference (95% CI)  | <i>P</i> | Difference (95% CI)  | <i>P</i> | Difference (95% CI)  | <i>P</i> |
| Continuous Model                        | 10g/day higher    |                      |          |                      |          |                      |          |
| All participants                        |                   | -0.30 (-0.49, -0.12) | 0.001    | -0.14 (-0.34, 0.05)  | 0.14     | -0.11 (-0.30, 0.09)  | 0.27     |
| eGFR $\geq$ 60mL/min/1.73m <sup>2</sup> |                   | -0.27 (-0.52,-0.02)  | 0.03     | -0.09 (-0.34,0.17)   | 0.50     | -0.10 (-0.36,0.16)   | 0.45     |
| eGFR<60mL/min/1.73m <sup>2</sup>        |                   | -0.29 (-0.57,-0.01)  | 0.04     | -0.20 (-0.49,0.09)   | 0.19     | -0.14 (-0.44,0.15)   | 0.34     |
| <i>P</i> for interaction                |                   | 0.92                 |          | 0.61                 |          | 0.74                 |          |
| Multi-category Model                    |                   |                      |          |                      |          |                      |          |
| Quartile 1                              | $\leq$ 14.5 g/day | Reference            |          | Reference            |          | Reference            |          |
| Quartile 2                              | >4.5-16.8 g/day   | -0.17 (-0.37, 0.03)  | 0.09     | -0.11 (-0.32, 0.10)  | 0.31     | -0.11 (-0.32, 0.10)  | 0.31     |
| Quartile 3                              | >16.8-19.2 g/day  | -0.30 (-0.50, -0.10) | 0.01     | -0.23 (-0.44, -0.02) | 0.03     | -0.20 (-0.41, 0.00)  | 0.05     |
| Quartile 4                              | > 19.2 g/day      | -0.41 (-0.61, -0.21) | <0.001   | -0.25 (-0.46, -0.05) | 0.02     | -0.23 (-0.44, -0.02) | 0.03     |
| <i>P</i> for trend                      |                   | <0.001               |          | 0.05                 |          | 0.13                 |          |

Total participants, n=1110: eGFR $\geq$ 60mL/min/1.73m<sup>2</sup>, n= 604; eGFR<60mL/min/1.73m<sup>2</sup>, n= 506

Covariates in model 1 includes protein intake (energy adjusted), age, BMI, smoking status, physical activity, and education.

Covariates in model 2 includes protein intake (energy adjusted), age, BMI, smoking status, physical activity, education, cardiovascular disease, diabetes, hyperlipidemia, hypertension, urinary albumin excretion rate and estimated glomerular filtration rate.

Abbreviations: OR, odd ratio; CI, confidence interval.

**Supplemental Table 3** Associations of dietary fiber with elevated serum CRP (>3 mg/L) stratified by CKD-EPI equation (n=1110).

| Fiber intake                            | Cut point      | Unadjusted        |          | Model 1           |          | Model 2           |          |
|-----------------------------------------|----------------|-------------------|----------|-------------------|----------|-------------------|----------|
|                                         |                | OR (95% CI)       | <i>P</i> | OR (95% CI)       | <i>P</i> | OR (95% CI)       | <i>P</i> |
| Continuous Model                        | 10g/day higher |                   |          |                   |          |                   |          |
| All participants                        |                | 0.57 (0.40, 0.81) | 0.002    | 0.68 (0.46, 0.99) | 0.04     | 0.73 (0.50, 1.08) | 0.12     |
| eGFR $\geq$ 60mL/min/1.73m <sup>2</sup> |                | 0.56 (0.32,0.99)  | 0.05     | 0.61(0.33,1.13)   | 0.12     | 0.68 (0.31,1.11)  | 0.10     |
| eGFR<60mL/min/1.73m <sup>2</sup>        |                | 0.62 (0.39,0.97)  | 0.04     | 0.74(0.46,1.21)   | 0.24     | 0.84 (0.50,1.40)  | 0.49     |
| <i>P</i> for interaction                |                | 0.80              |          | 0.57              |          | 0.39              |          |

Total participants, n=1110: eGFR $\geq$ 60mL/min/1.73m<sup>2</sup>, n= 490; eGFR<60mL/min/1.73m<sup>2</sup>, n= 620

Covariates in model 1 includes protein intake (energy adjusted), age, BMI, smoking status, physical activity, and education.

Covariates in model 2 includes protein intake (energy adjusted), age, BMI, smoking status, physical activity, education, cardiovascular disease, diabetes, hyperlipidemia, hypertension, urinary albumin excretion rate and estimated glomerular filtration rate.

Abbreviations: OR, odd ratio; CI, confidence interval.

**Supplemental Table 4** Associations of dietary fiber (per 10g/day higher) with risk of mortality excluding deaths that occurred within 2 years from baseline (n=1090).

| Outcomes                                | No of events<br>/No.at risk | Unadjusted        |         | Adjusted          |         |
|-----------------------------------------|-----------------------------|-------------------|---------|-------------------|---------|
|                                         |                             | HR (95% CI)       | P value | HR (95% CI)       | P value |
| <b>All-cause mortality</b>              |                             |                   |         |                   |         |
| All participants                        | 280/1090                    | 0.67 (0.48, 0.94) | 0.02    | 0.83 (0.57, 1.20) | 0.32    |
| eGFR $\geq$ 60mL/min/1.73m <sup>2</sup> | 124/596                     | 1.03 (0.64, 1.65) | 0.89    | 1.29 (0.75, 2.22) | 0.36    |
| eGFR<60mL/min/1.73m <sup>2</sup>        | 156/494                     | 0.49 (0.31, 0.79) | 0.01    | 0.59 (0.36, 0.99) | 0.04    |
| <i>P</i> for interaction                |                             | 0.03              |         | 0.04              |         |
| <b>CVD-mortality</b>                    |                             |                   |         |                   |         |
| All participants                        | 127/1090                    | 0.91 (0.57, 1.46) | 0.70    | 1.20 (0.71, 2.02) | 0.49    |
| eGFR $\geq$ 60mL/min/1.73m <sup>2</sup> | 46/596                      | 1.30 (0.62, 2.77) | 0.48    | 1.56 (0.66, 3.68) | 0.31    |
| eGFR<60mL/min/1.73m <sup>2</sup>        | 81/494                      | 0.81 (0.44, 1.49) | 0.50    | 1.06 (0.55, 2.06) | 0.85    |
| <i>P</i> for interaction                |                             | 0.34              |         | 0.78              |         |
| <b>Cancer-mortality</b>                 |                             |                   |         |                   |         |
| All participants                        | 103/1090                    | 0.59 (0.34, 1.00) | 0.05    | 0.62 (0.33, 1.15) | 0.13    |
| eGFR $\geq$ 60mL/min/1.73m <sup>2</sup> | 51/596                      | 1.10 (0.53, 2.28) | 0.79    | 1.51 (0.64, 3.59) | 0.35    |
| eGFR<60mL/min/1.73m <sup>2</sup>        | 52/494                      | 0.30 (0.13, 0.70) | 0.01    | 0.31 (0.12, 0.81) | 0.02    |
| <i>P</i> for interaction                |                             | 0.02              |         | 0.01              |         |

Covariates in adjusted model includes protein intake (energy adjusted), age, BMI, smoking status, physical activity, education, cardiovascular disease, diabetes, hyperlipidemia, hypertension, and estimated glomerular filtration rate, urinary albumin excretion rate and CRP (additionally cancer at baseline was included in the cancer related mortality analysis).

Abbreviations: CVD, cardiovascular disease; HR, hazard ration; CI, confidence interval

**Supplemental Table 5** Associations of dietary fiber (per 10g/day higher) with risk of mortality stratified by CKD-EPI equation (n=1110).

| Outcomes                                | No. of events/<br>No.at risk | Unadjusted        |                | Adjusted Model    |                |
|-----------------------------------------|------------------------------|-------------------|----------------|-------------------|----------------|
|                                         |                              | HR (95% CI)       | <i>P</i> value | HR (95% CI)       | <i>P</i> value |
| <b>All-cause mortality</b>              |                              |                   |                |                   |                |
| All participants                        | 300/1110                     | 0.66 (0.48, 0.91) | 0.01           | 0.80 (0.56, 1.15) | 0.23           |
| eGFR $\geq$ 60mL/min/1.73m <sup>2</sup> | 107/490                      | 1.17 (0.70, 1.95) | 0.54           | 1.47 (0.84, 2.58) | 0.18           |
| eGFR<60mL/min/1.73m <sup>2</sup>        | 193/620                      | 0.50 (0.33, 0.75) | 0.001          | 0.59 (0.37, 0.96) | 0.03           |
| <i>P</i> for interaction                |                              | 0.01              |                | 0.02              |                |
| <b>CVD-mortality</b>                    |                              |                   |                |                   |                |
| All participants                        | 127/1110                     | 0.87 (0.55, 1.38) | 0.56           | 1.13 (0.68, 1.89) | 0.64           |
| eGFR $\geq$ 60mL/min/1.73m <sup>2</sup> | 43/490                       | 1.26 (0.57, 2.78) | 0.57           | 2.00 (0.83, 4.82) | 0.12           |
| eGFR<60mL/min/1.73m <sup>2</sup>        | 95/620                       | 0.80 (0.46, 1.39) | 0.42           | 0.90 (0.48, 1.70) | 0.74           |
| <i>P</i> for interaction                |                              | 0.35              |                | 0.36              |                |
| <b>Cancer-mortality</b>                 |                              |                   |                |                   |                |
| All participants                        | 111/1110                     | 0.57 (0.33, 0.97) | 0.04           | 0.60 (0.32, 1.10) | 0.09           |
| eGFR $\geq$ 60mL/min/1.73m <sup>2</sup> | 44/490                       | 1.56 (0.73, 3.37) | 0.25           | 1.61 (0.68, 3.85) | 0.28           |
| eGFR<60mL/min/1.73m <sup>2</sup>        | 67/620                       | 0.28 (0.14, 0.58) | 0.001          | 0.35 (0.15, 0.84) | 0.02           |
| <i>P</i> for interaction                |                              | 0.001             |                | 0.01              |                |

Covariates in adjusted model includes protein intake (energy adjusted), age, BMI, smoking status, physical activity, education, cardiovascular disease, diabetes, hyperlipidemia, hypertension, and estimated glomerular filtration rate, urinary albumin excretion rate and CRP (additionally cancer at baseline was included in the cancer related mortality analysis).

Abbreviations: CVD, cardiovascular disease; HR, hazard ratio; CI, confidence interval
